# Supplementary material for: Single-oocyte proteome-transcriptome co-profiling reveals a role of dysregulated lactate metabolism in oocyte aging
Source: Research Square preprint supplement (doi:10.21203/rs.3.rs-6309099/v1), 2025-05-09
Supplement: Supplementary file 1 [file 6cf3022df65601263a426513.docx]

**Extended Data Figures**

**
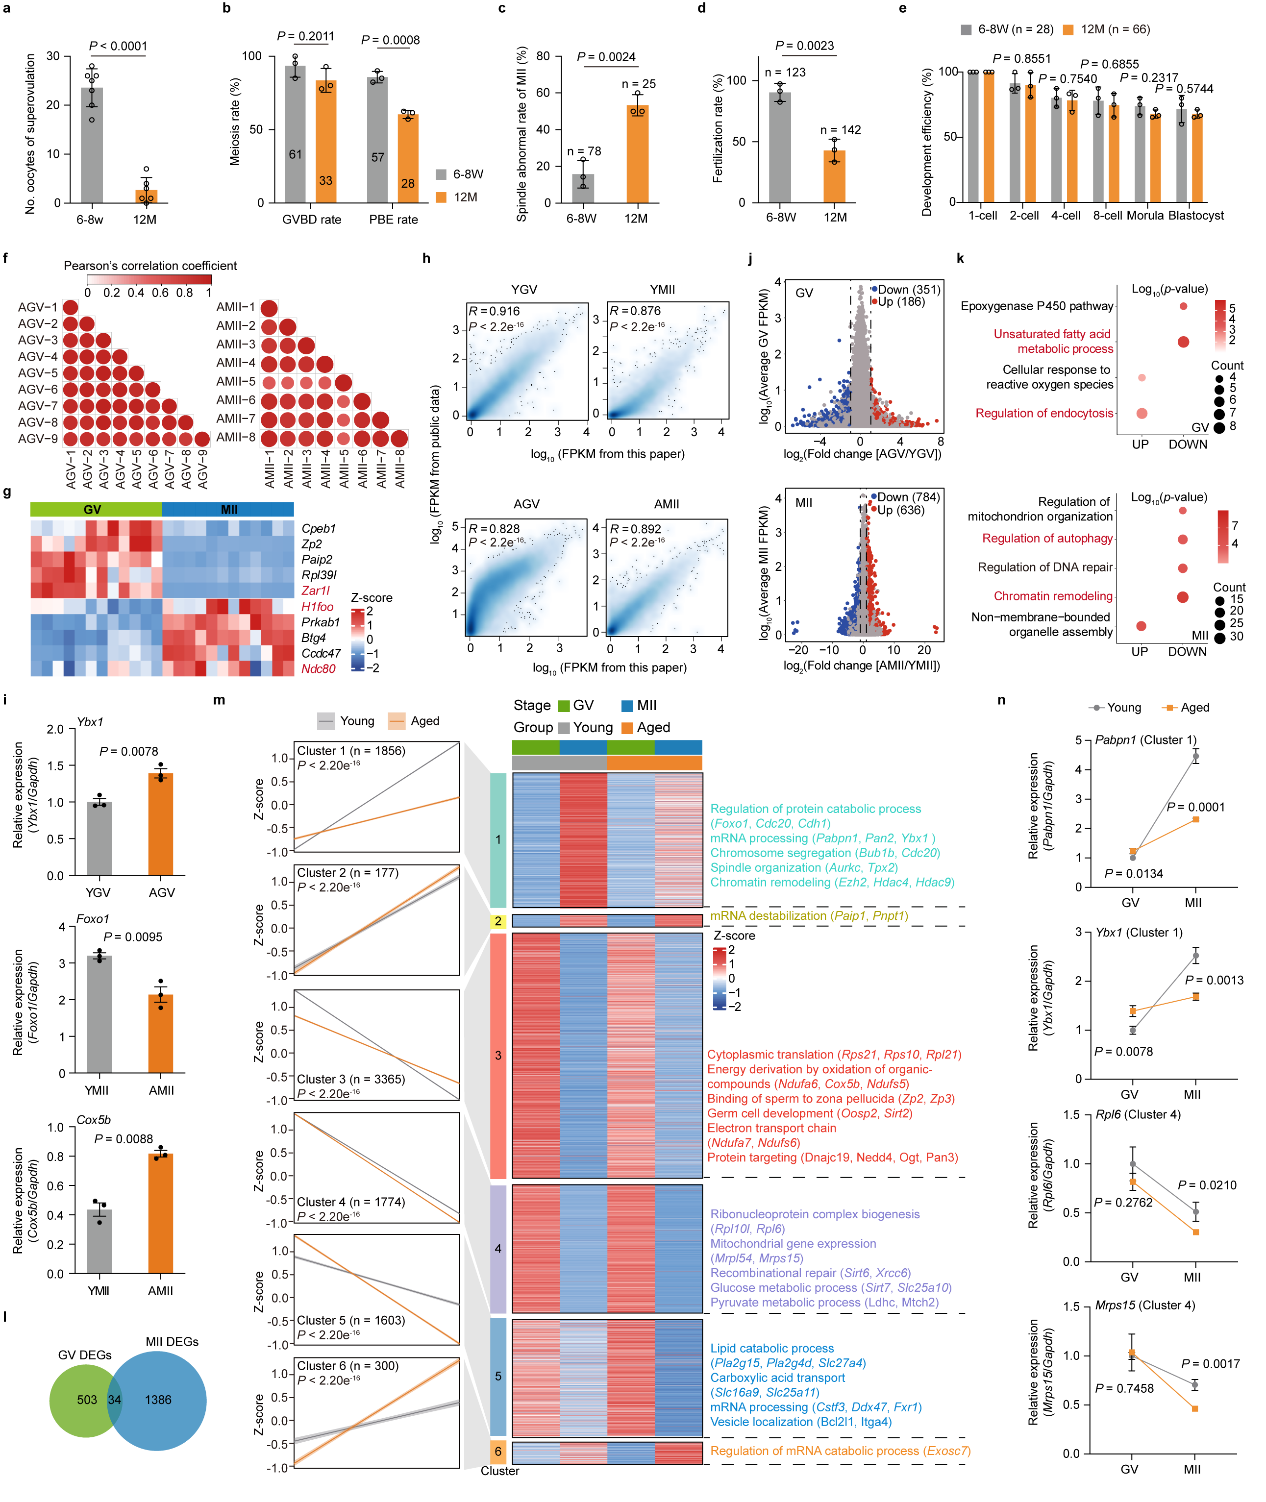
**

**Extended Data Fig. 1: Overview of single-cell transcriptomic landscape in mouse-aged oocytes**

**a,** Ovarian ovulation counts in 6-8 week-old (n = 7) and 12-month-old mice (n = 6).

**b,** The percentage of germinal vesicle breakdown (GVBD) and polar body extrusion (PBE) was quantified in oocytes from 6-8 week-old and 12-month-old mice. Results are depicted with three replicates per group. The overall count of oocytes examined (n) is noted as the number within each bar.

**c,** The abnormal spindle rate of indicated metaphase II (MII) oocytes. Results are depicted with three replicates per group. The overall count of oocytes examined (n) is noted as the number within each bar.

**d,** The fertilization rate of indicated oocytes. Results are depicted with three replicates per group. The overall count of oocytes examined (n) is noted as the number within each bar.

**e,** Thedevelopmental rate of oocytes isolated from 6–8-week-old and 12-month-old mice after fertilization. Results are depicted with three replicates per group. The overall count of oocytes examined (n) is noted as the number within each bar.

**f,** The correlation coefficient of the transcriptome in the aged GV (n = 9) and MII (n = 8) oocytes. The detailed correlation coefficient for all sample groups is listed in **Supplementary Table 1**.

**g,** The heatmap showing the mRNA expression levels of representative stage-specific genes in young mouse oocytes.

**h,** The correlation coefficient (*R*) between our profiling data and previously published studies of transcriptomic data in young and aged mouse oocytes (GEO: GSE118564, GEO: GSE173598, and GEO: GSE184635)1-3. *P* value was obtained using the parametric t-test.

**i,** Quantitative real-time reverse transcription PCR (qRT-PCR) validation on the aging-induced changes of selected genes in indicated oocytes. *Gapdh* serves as a reference gene. n =3.

**j,** Volcano plot displays differently expressed genes (DEGs, upregulated, red; downregulated, blue) with statistical significance (the genes satisfying |Log2Foldchange| > 1 and *P* values < 0.05 were identified as DEGs) in oocytes from aged mice compared to those from young ones. Total genes analyzed (n) = 25,416. *P* values were obtained using the Wald test within a negative binomial generalized linear model.

**k,** GO term enrichment analysis of DEGs identified in **Extended Data Fig. 1j**. *P* value was obtained using the hypergeometric test.

**l,** The overlap of aging-induced DEGs in GV and MII phases.

**m,** The temporal dynamics (**left**) and heatmap (**right**) showing the expression patterns of six clusters of mRNAs, which exhibited distinct expression dynamics during oocyte maturation between young and aged oocytes, and the corresponding GO terms for each cluster of genes. The Log2(Foldchange [GV vs MII]) in young and aged oocytes of the indicated gene was used to perform statistical analysis. *P* value was obtained using two-tailed Mann-Whitney U-tests. The gene numbers for each cluster (n) were indicated in the figure.

**n,** qRT-PCR validation on the temporal expression patterns of selected genes. n = 3.

**a-e, i, n,** Results are represented as mean ± s.e.m., and statistical analysis was performed using an unpaired two-tailed *t*-test. *P* values were indicated in the figures.

**a-i,** YGV, Young GV oocytes; AGV, Aged GV oocytes; YMII. Young MII oocytes; AMII, Aged MII oocytes.

**
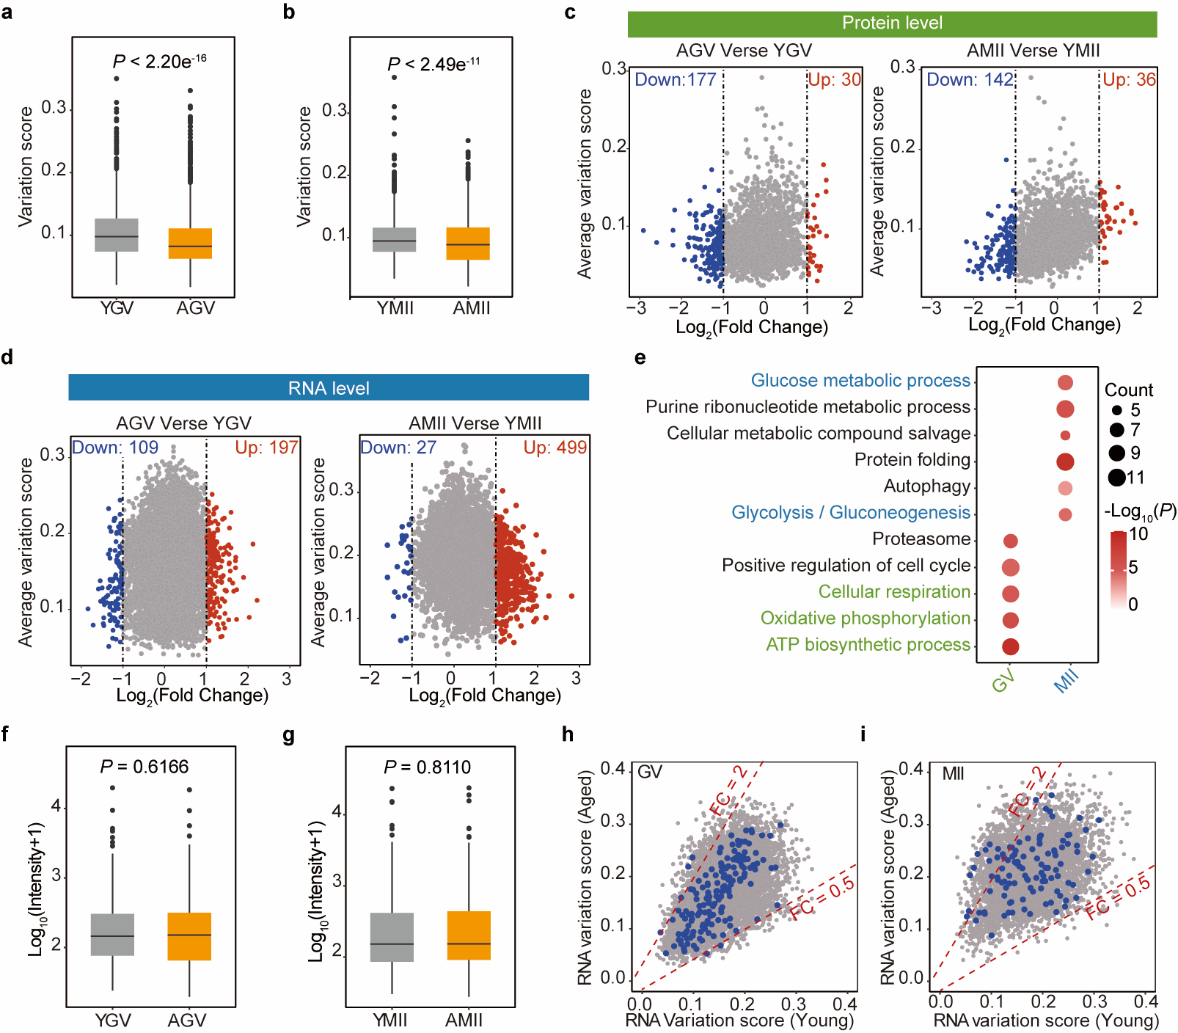
**

**Extended Data Fig. 2: Protein expression variance decreased upon mouse oocyte aging**

**a-b,** The box plots showing the variation score of protein expression in indicated GV (**a**) or MII (**b**) oocytes. *P* value was obtained using two-tailed Mann-Whitney U-tests. n = 12 (YGV), 9 (AGV), 12 (YMII), 8 (AMII).

**c,** Thevolcano plot showingthe proteins with upregulated or downregulated expression variation in GV (**left**) or MII (**right**) oocytes. The proteins satisfying Log2(Foldchange [Aged vs Young]) of expression variation higher than 1 or lower than -1 were identified as proteins with expression variation changes. Total protein analyzed (n) = 2,001 (GV), 1,712 (MII).

**d,** Thevolcano plot showingthe genes with upregulated or downregulated expression variation in GV (**left**) or MII (**right**) oocytes. The genes satisfying Log2(Foldchange [Aged vs Young]) of expression variation higher than 1 or lower than -1 were identified as genes with expression variation changes. Total genes analyzed (n) = 8,695 (GV), 4,560 (MII).

**e,** GO-term enrichment analysis of the proteins with a more uniform expression upon oocyte aging. *P* value was obtained using the hypergeometric test.

**f,** Thebox plot showing the expression level of the proteins that exhibit more uniform expression during GV oocyte aging in indicated oocytes. *P* value was obtained using two-tailed Mann-Whitney U-tests. n = 12 (YGV), 9 (AGV).

**g,** Thebox plot showing the expression level of the proteins that exhibit more uniform expression during MII oocyte aging in indicated oocytes. *P* value was obtained using two-tailed Mann-Whitney U-tests. n = 12 (YMII), 8 (AMII).

**h,** RNA variation score of genes in young and aged GV oocytes. The genes of which proteins exhibited more uniform expression during GV oocyte aging were highlighted in blue. The red dot line indicated the threshold of a 2-fold increase (fold change [FC] = 2) or decrease (FC = 0.5) between young and aged oocytes. Total genes analyzed (n) = 8,651.

**i,** RNA variation score analysis of genes in young and aged MII oocytes. The genes of which proteins exhibited more uniform expression during MII oocyte aging were highlighted in blue. The red dot line indicated the threshold of a 2-fold increase (fold change [FC] = 2) or decrease (FC = 0.5) of RNA variation score in aged oocytes compared to the young control. Total genes analyzed (n) = 4,560.

**a-g,** YGV, Young GV oocytes; AGV, Aged GV oocytes; YMII. Young MII oocytes; AMII, Aged MII oocytes.

**
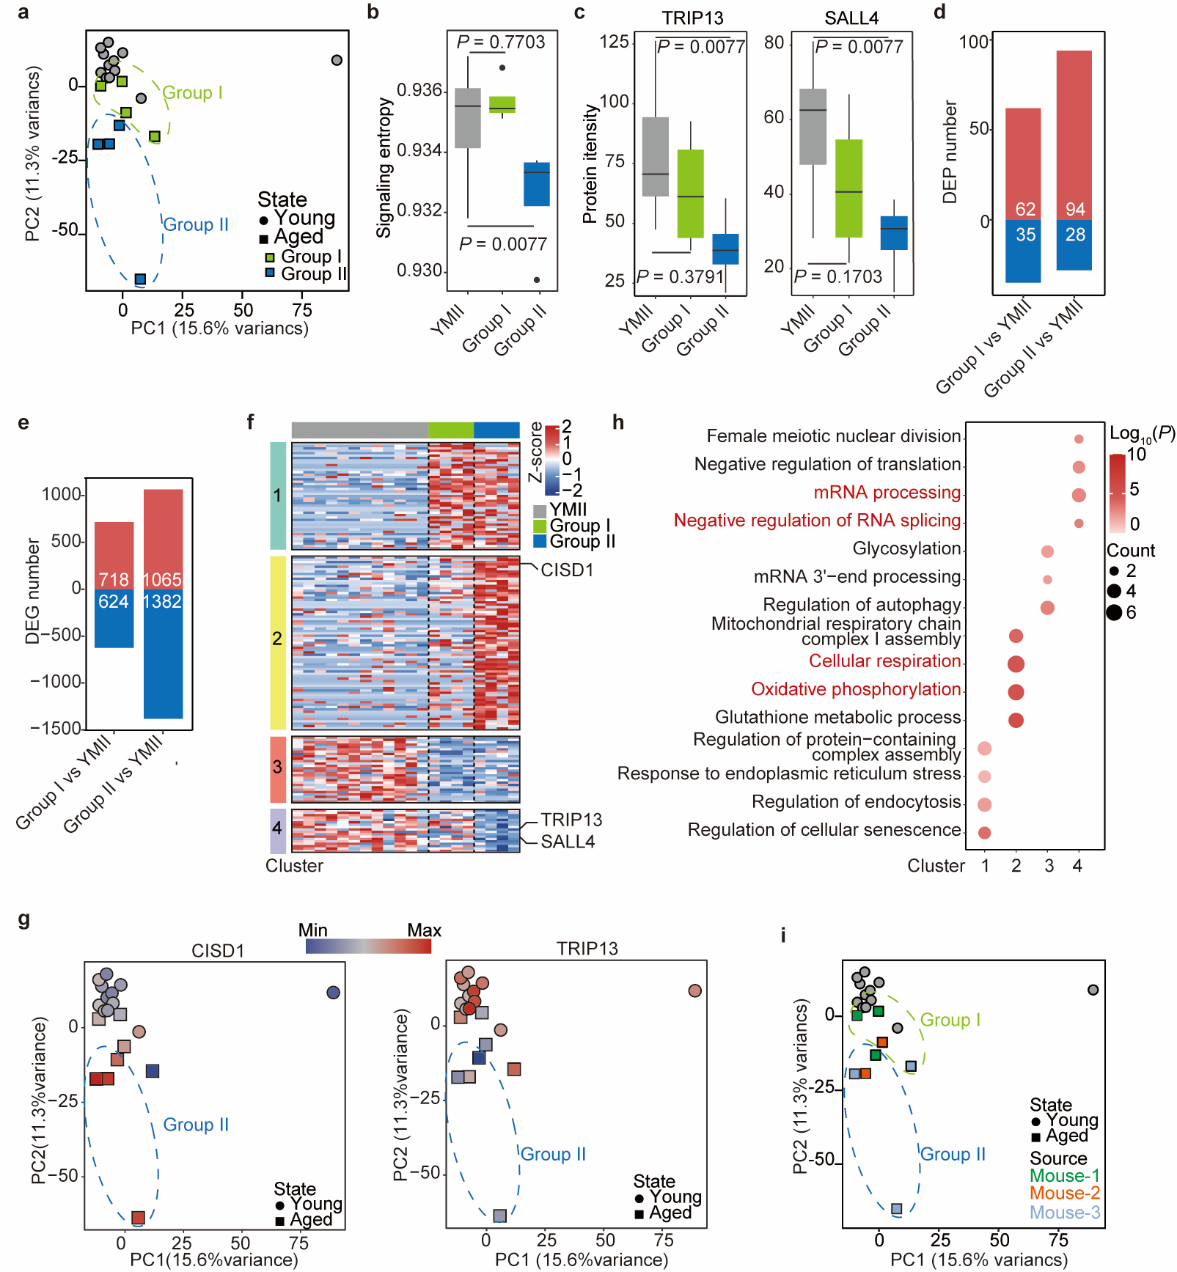
Extended Data Fig. 3: scSTAP profiling captured the molecular heterogeneity in mouse-aged MII oocytes**

**a,** The PCA plot based on proteomic data of profiled MII oocytes. Individual oocytes are depicted as dots, with variations in shape and color that indicate the distinct features of oocytes. Group I/II are two subgroups of aged oocytes.

**b,** The signaling entropy calculated using proteomic data of indicted groups of oocytes. *P* value was obtained using two-tailed Mann-Whitney U-tests. n = 12 (YMII), 4 (Group I), 4 (Group II).

**c,** The box plot showing the protein expression level of selected genes in indicated oocytes. *P* value was obtained using two-tailed Mann-Whitney U-tests. n = 12 (YMII), 4 (Group I), 4 (Group II).

**d,** Numbers of differentially expressed proteins (DEPs) in the indicated oocytes compared to young MII oocytes. The proteins satisfying |Log2Foldchange| > 1 and *P* values < 0.05 were identified as DEPs. Red bars indicated upregulated proteins and blue bars indicated downregulated proteins. *P* values were obtained using the Wilcoxon rank-sum test.

**e,** Numbers of DEGs in the indicated oocytes compared to young MII oocytes. The genes satisfying |Log2Foldchange| > 1 and *P* values < 0.05 were identified as DEGs. Red bars indicated upregulated genes and blue bars indicated downregulated genes. *P* values were obtained using the Wald test within a negative binomial generalized linear model.

**f,** The heatmap showing the expression level of four clusters of proteins with different expression patterns between young, Group I, and Group II oocytes. Proteins in Clusters 1 and 3 are upregulated and downregulated, respectively, in both Group I and Group II oocytes compared to young oocytes. In contrast, proteins in Clusters 2 and 4 are exclusively upregulated and downregulated in Group II oocytes. The proteins satisfying |Log2Foldchange| > 1 and *P* values < 0.05 were identified as differently expressed proteins. n = 45 (cluster 1), 73 (cluster 2), 28 (cluster 3), 18 (cluster 4). *P* values were obtained using the Wilcoxon rank-sum test.

**g,** PCA plots showing the expression level of representative clusters 2/4 proteins identified in **Extended Data Fig. 3f** in individual MII oocytes.

**h,** GO term enrichment analysis of protein clusters identified in **Extended Data Fig. 3f**. *P* value was obtained using the hypergeometric test.

**i,** The PCA plot showing the aged MII oocytes isolated from the same mouse.

**b-f,** YMII, young MII oocytes.

**
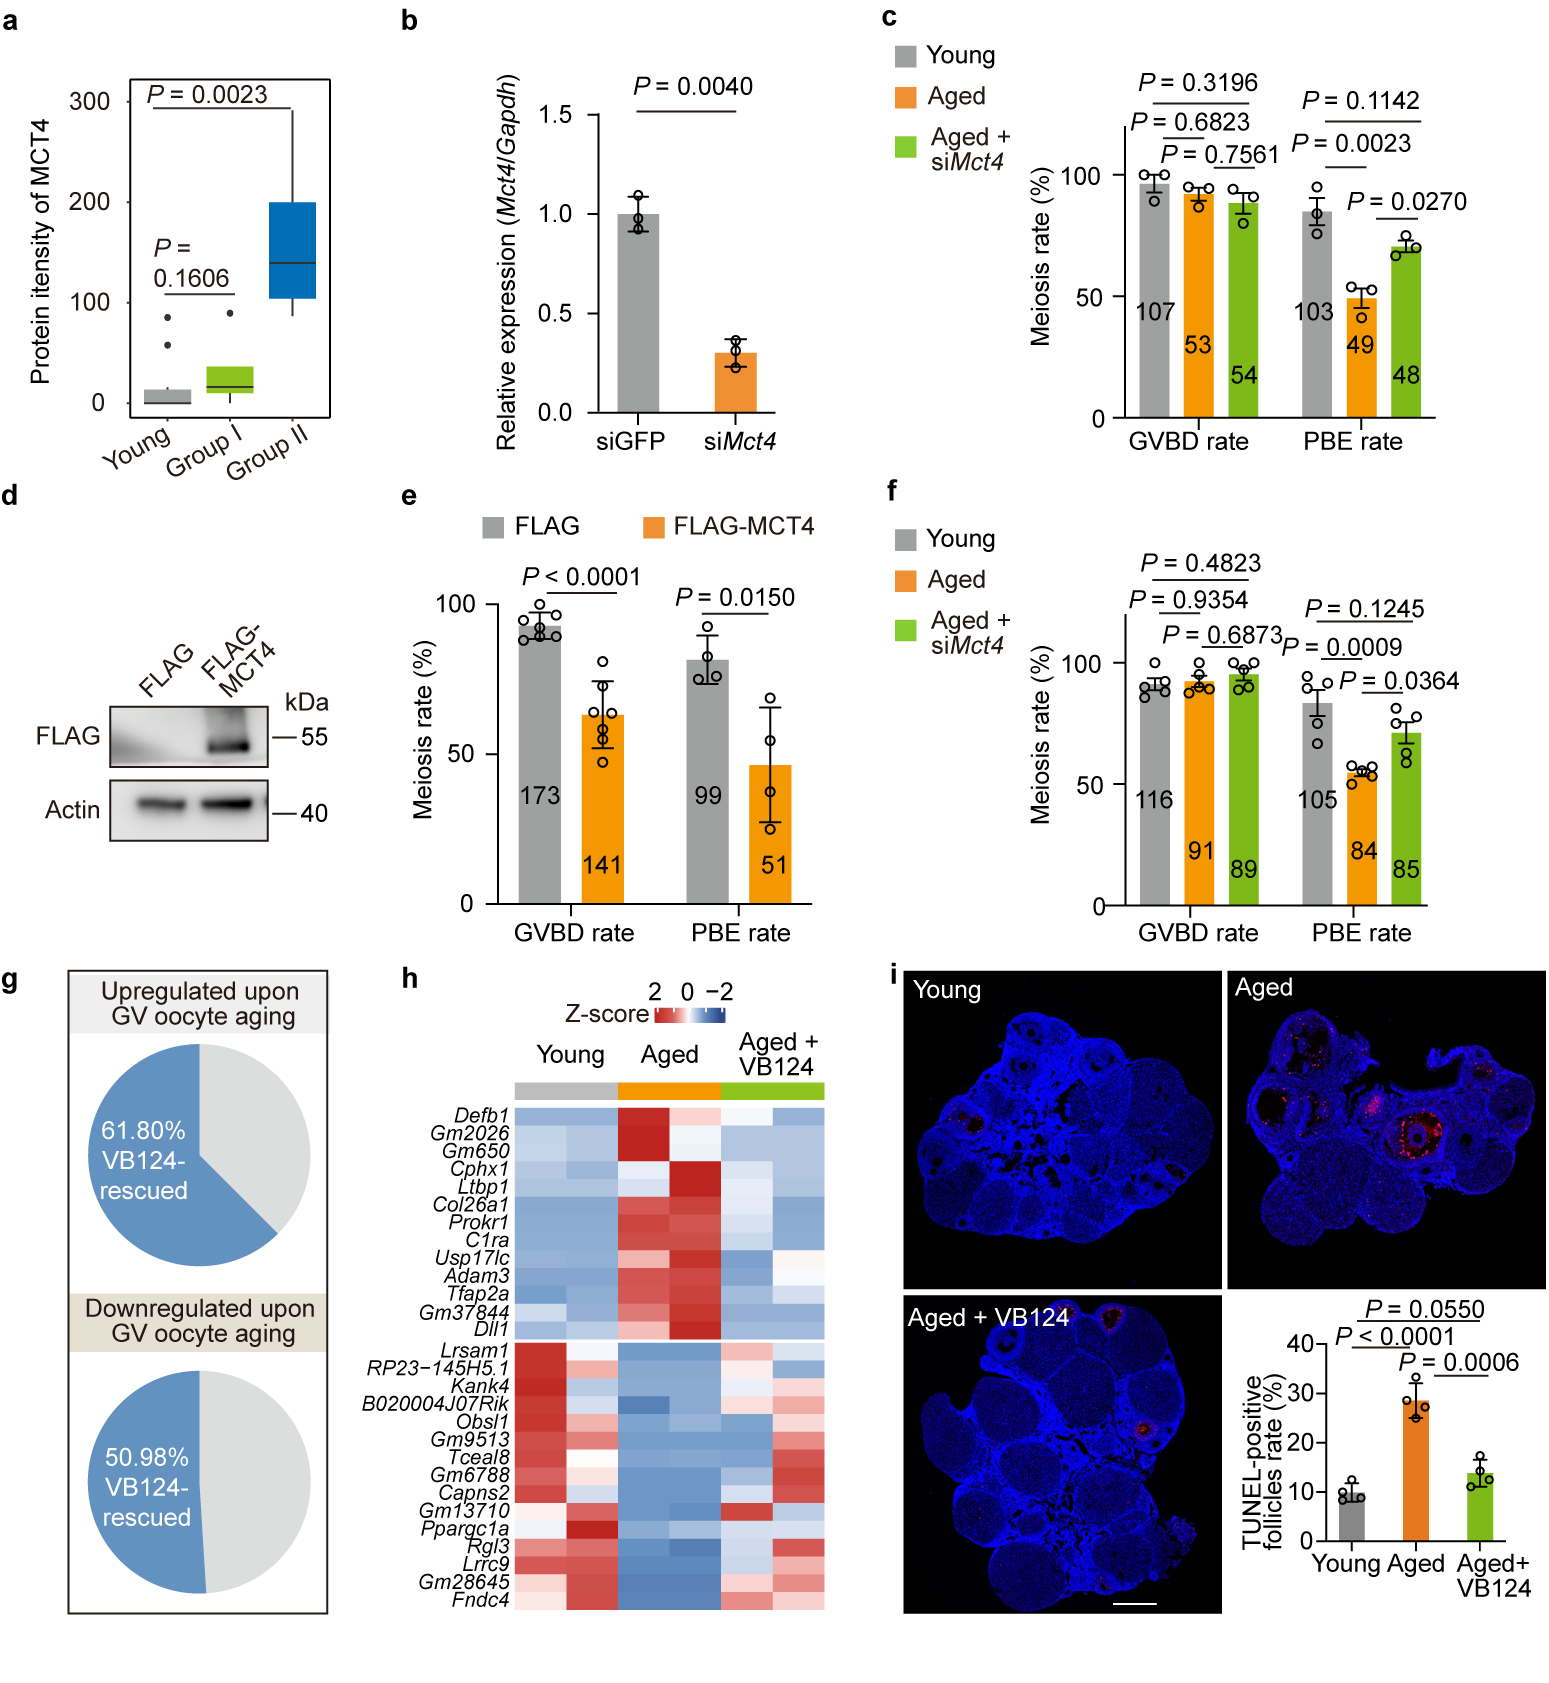
Extended Data Fig. 4: The role of MCT4 in meiotic cell cycle progression and fertility**

**a,** Thebox plot showing the protein expression of MCT4 in indicated oocytes. n = 12 (YMII), 4 (Group I), 4 (Group II).

**b,** qRT-PCR validation on *Mct4*-knockdown efficiency in mouse aged GV stage. n = 3. *Gapdh* serves as a control gene.

**c,** The rate of GVBD and PBE in indicated mouse oocytes collected at the GV stage. Results are depicted with three replicates per group. The overall count of oocytes examined (n) is noted as the number within each bar.

**d,** Western-blotting validation on overexpression of MCT4 in mouse young oocytes at GV stage. Actin serves as a control protein.

**e,** The GVBD and PBE rate of indicated mouse young oocytes collected at the GV stage. Results are depicted with seven (GVBD) and four (PBE) replicates per group. The overall count of oocytes examined (n) is noted as the number within each bar.

**f,** The GVBD and PBE rate of indicated cultured oocytes collected at the GV stage. Results are depicted with five replicates per group. The overall count of oocytes examined (n) is noted as the number within each bar.

**g,** The pie chart showing the percentage of upregulated (**top,** n = 89) or downregulated (**bottom,** n = 204) genes induced by GV oocyte aging that are rescued by VB124 treatment.

**h,** The heatmap showing the expression pattern of selected genes in indicated GV oocytes.

**i,** Representativemicrographs of atretic ovarian follicles processed through TUNEL histochemical analysis (**fluorescent image**) and the quantification of apoptotic follicle ratio in indicated oocytes (**bar graph**). Results are depicted with four replicates (n = 4) per group. Scale bar = 300 μm. VB124 was administered daily at a dose of 30 mg/kg body weight.

**b, c, e-f, I,** Results are represented as mean ± s.e.m., and statistical analysis was performed using an unpaired two-tailed *t*-test. *P* values were indicated in the figures.


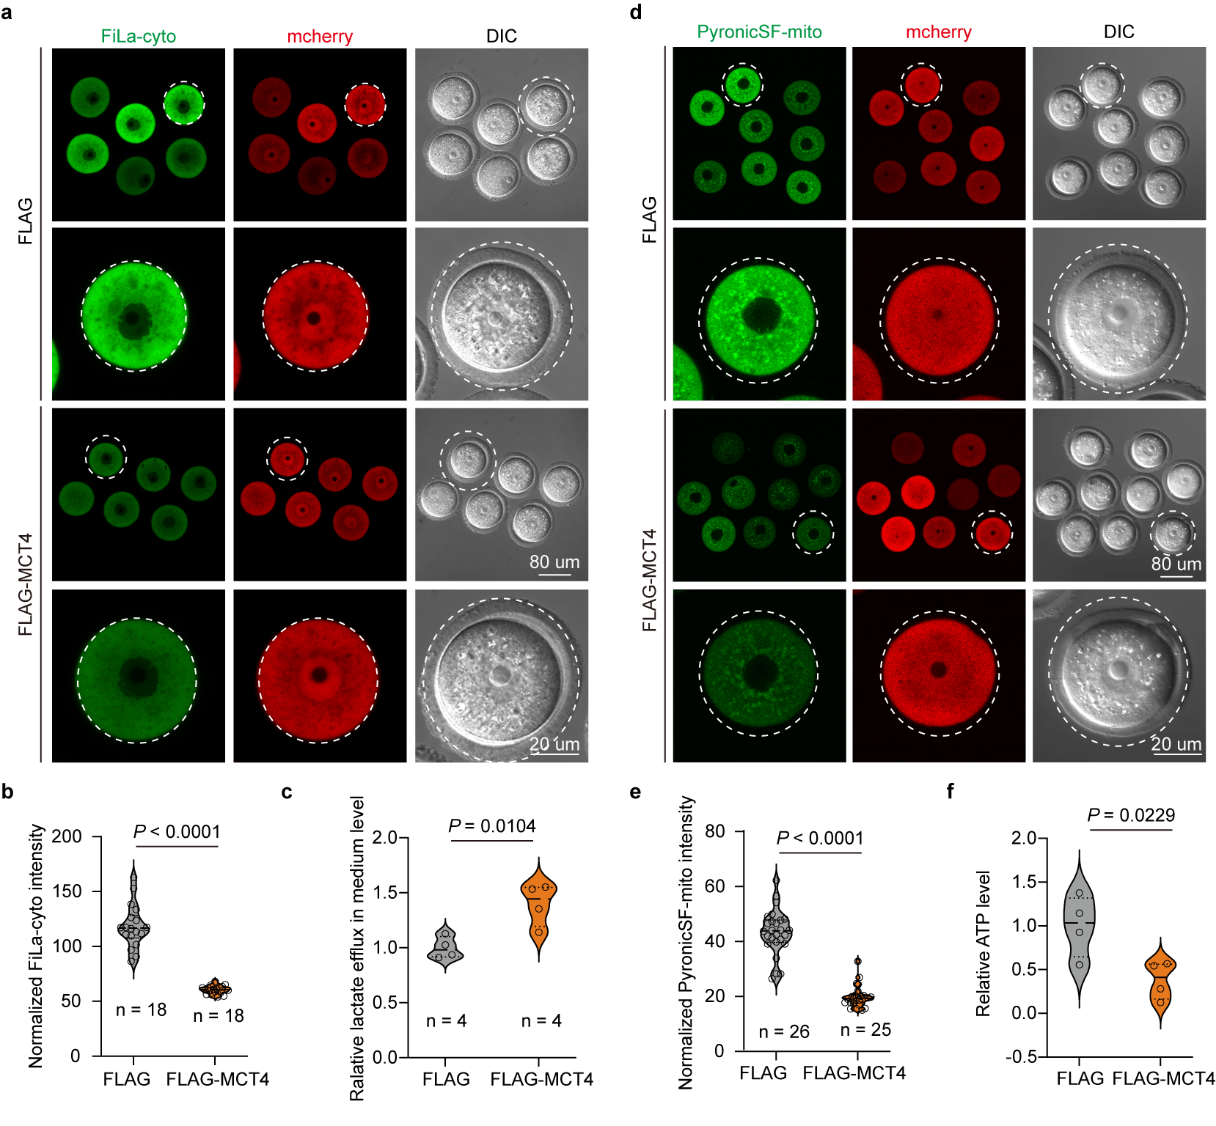
**Extended Data Fig. 5: MCT4-overexpression induced increased lactate export and decreased mitochondrial pyruvate in mouse young GV oocytes**

**a,** Representative sensor FiLa-cyto fluorescence microscopy and DIC (Differential interference contrast) images of indicated mouse GV oocytes with sensor FiLa-cyto expressed in the oocyte cytosol. Scale bars are indicated within the figure. Fila-cyto and mCherry were co-injected into the oocyte, and mCherry served as a control for injection quantity.

**b,** Normalized FiLa-cyto intensity in the cytoplasm of indicated GV oocytes. The quantity of injected FiLa-cyto is standardized relative to the signal from mCherry, which is co-injected into the oocyte. n, the overall count of oocytes examined.

**c,** Relative lactate efflux of a single GV oocyte from the indicated group compared to the FLAG-expressing GV oocyte group was shown. n, the overall count of oocytes examined. Results were normalized to control oocytes.

**d,** Representativesensor PyronicSF fluorescence microscopy and DIC images of indicated mouse GV oocytes with sensor PyronicSF expressed in the oocyte mitochondria. Scale bars are indicated within the figure. PyronicSF and mCherry were co-injected into the oocyte, and mCherry served as a control for injection quantity.

**e,** Normalized PyronicSF intensity in the mitochondria of indicated GV oocytes. The quantity of injected PyronicSF is standardized relative to the signal from mCherry, which is co-injected into the oocyte. n, the overall count of oocytes examined.

**f,** Relative ATP levels of indicated young GV oocytes. Five oocytes were pooled as one biological replicate, with four replicates per group included. The overall count of oocytes examined for each group (n) = 20. Results were normalized to control (FLAG) oocytes.

**a-f,** Mouse young GV oocytes were analyzed. Results are represented as mean ± s.e.m., and statistical analysis was performed using an unpaired two-tailed *t*-test. *P* values were indicated in the figures.

**
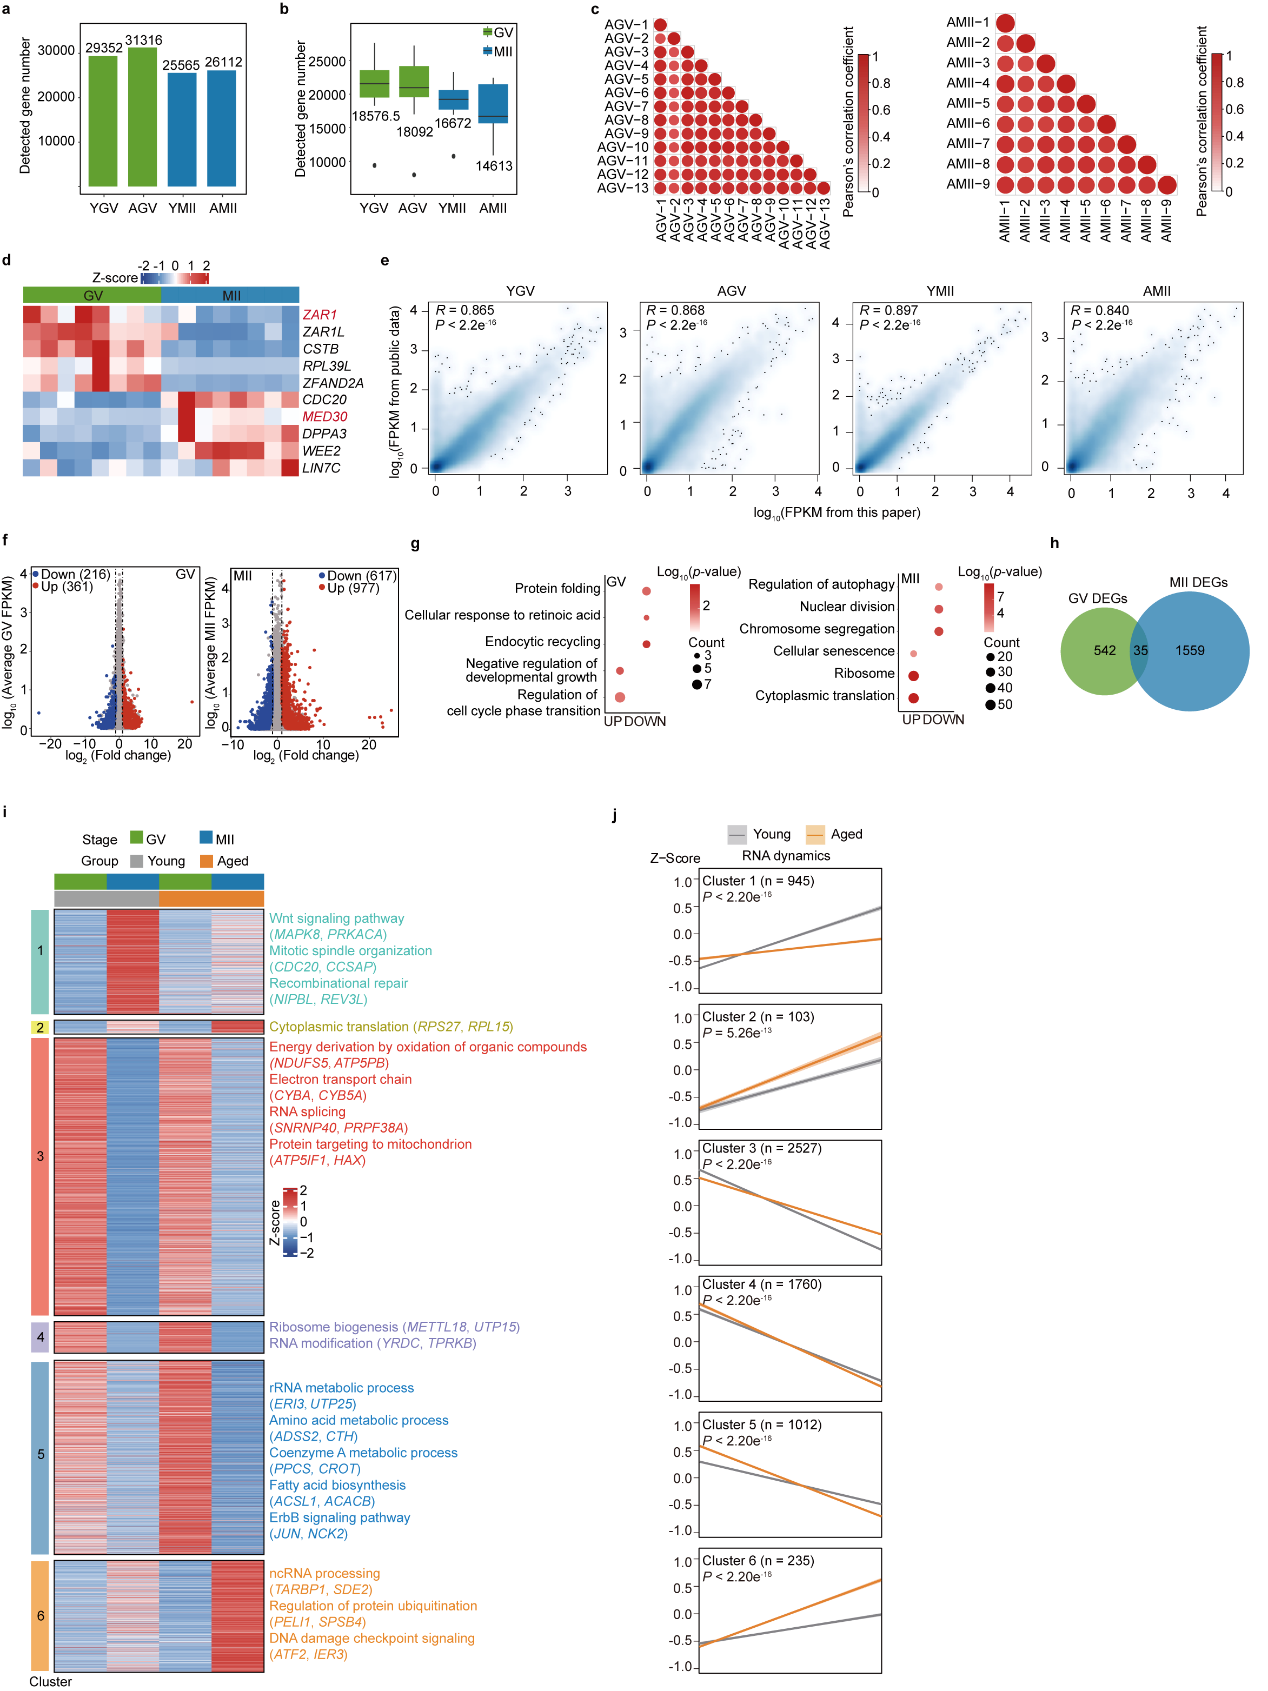
Extended Data Fig. 6: Overview of single-cell transcriptomic landscape in human-aged oocytes**

**a,** The number of total identified genes in human oocyte samples.

**b,** Thebox plot showing the range of identified gene numbers in profiled human oocytes. The number in the figure refers to the average identified proteins for indicated oocytes. n = 9 (YGV), 8 (YMII), 13 (AGV), 8 (AMII).

**c,** The correlation coefficient of the transcriptome in the aged oocytes. The detailed correlation coefficient for all sample groups is listed in **Supplementary Table 1**. n = 13 (AGV), 8 (AMII).

**d,** The heatmap showing the mRNA expression levels of representative stage-specific genes in young human oocytes.

**e,** The correlation coefficient (*R*) between our profiling data and previously published studies of transcriptomic data in young and aged human oocytes (GEO: GSE197578 and GEO: GSE164371)4, 5. P value was obtained using the parametric t-test.

**f,** Thevolcano plot displays DEGs (upregulated, red; downregulated, blue) with statistical significance (The genes satisfying |Log2Foldchange| > 1 and *P* values < 0.05 were identified as DEGs) in oocytes from aged humans compared to those from young ones. Total genes analyzed (n) = 33,193. *P* values were obtained using the Wald test within a negative binomial generalized linear model.

**g,** GO term enrichment analysis of DEGs identified in **extended data Fig. 6f**. *P* value was obtained using the hypergeometric test.

**h,** The overlap of aging-induced DEGs in human GV and MII phases.

**i,** The heatmap (**left**) showing the expression of six clusters of mRNAs, which exhibited distinct expression dynamics during oocyte maturation between young and aged human oocytes (see Methods), and the corresponding GO terms for each cluster of genes (**right**). The gene numbers for each cluster (n) were indicated in **Extended Data** **Fig. 6j**.

**j,** Thetemporal expression patterns of mRNA clusters identified in **Extended data Fig. 6i**. The Log2(Foldchange [GV vs MII]) in young and aged oocytes of the indicted gene was used to perform statistical analysis. *P* value was obtained using two-tailed Mann-Whitney U-tests. The gene numbers for each cluster (n) were indicated in the figure.

**a-e,** YGV, Young GV oocytes; AGV, Aged GV oocytes; YMII. Young MII oocytes; AMII, Aged MII oocytes.

**
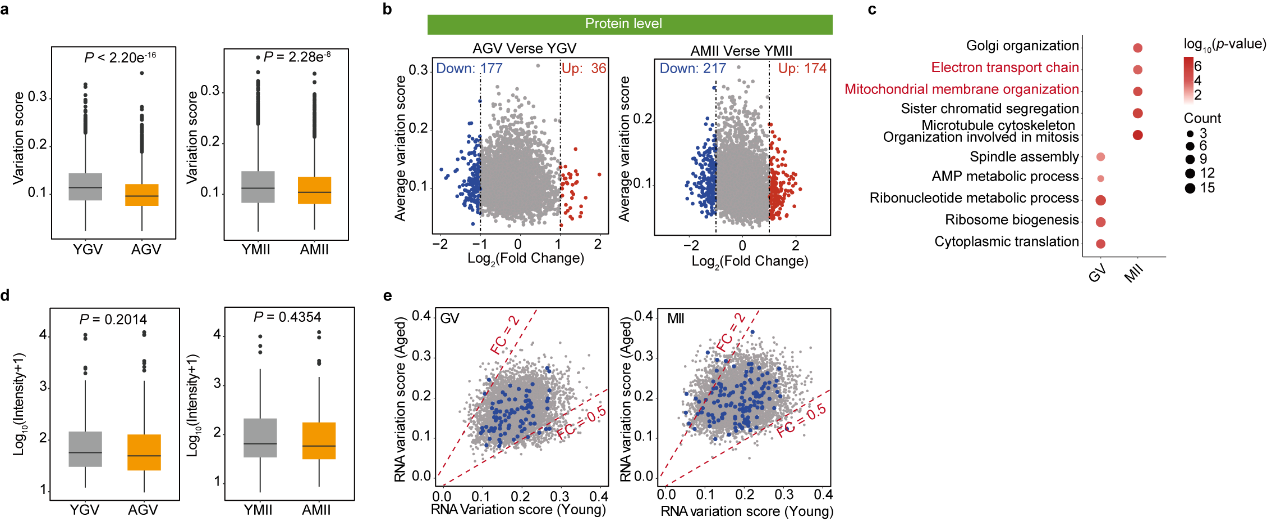
Extended Data Fig. 7: Protein expression variance decreased upon human oocyte** **aging**

**a,** The box plots showing the variation score of protein expression in indicated human GV (**left**) or MII (**right**) oocytes. *P* value was obtained using two-tailed Mann-Whitney U-tests. n = 9 (YGV), 8 (YMII), 13 (AGV), 8 (AMII).

**b,** Thevolcano plot showingthe proteins with upregulated or downregulated expression variation in human GV (**left**) or MII (**right**) oocytes. The proteins satisfying Log2(Foldchange [Aged vs Young]) of expression variation higher than 1 or lower than -1 were identified as proteins with expression variation changes. Total proteins analyzed (n) = 3,489 (GV), 3,192 (MII).

**c,** GO-term enrichment analysis of the proteins with a more uniform expression upon oocyte aging. *P* value was obtained using the hypergeometric test.

**d,** Thebox plot showing the expression level of the proteins that exhibit more uniform expression during GV (**left**) or MII (**right**) oocyte aging in indicated oocytes. *P* value was obtained using two-tailed Mann-Whitney U-tests. n = 9 (YGV), 8 (YMII), 13 (AGV), 8 (AMII).

**e,** RNA variation score analysis of genes in young and aged GV (**left**) or MII (**right**) oocytes. The genes of which proteins exhibited more uniform expression during GV (**left**) or MII (**right**) oocyte aging were highlighted in blue. The red dot line indicated the threshold of a 2-fold increase (fold change [FC] = 2) or decrease (FC = 0.5) of RNA variation score in aged oocytes compared to the young control. Total genes analyzed (n) = 4,919 (GV), 5,983 (MII).

**a-d,** YGV, Young GV oocytes; AGV, Aged GV oocytes; YMII. Young MII oocytes; AMII, Aged MII oocytes.

**
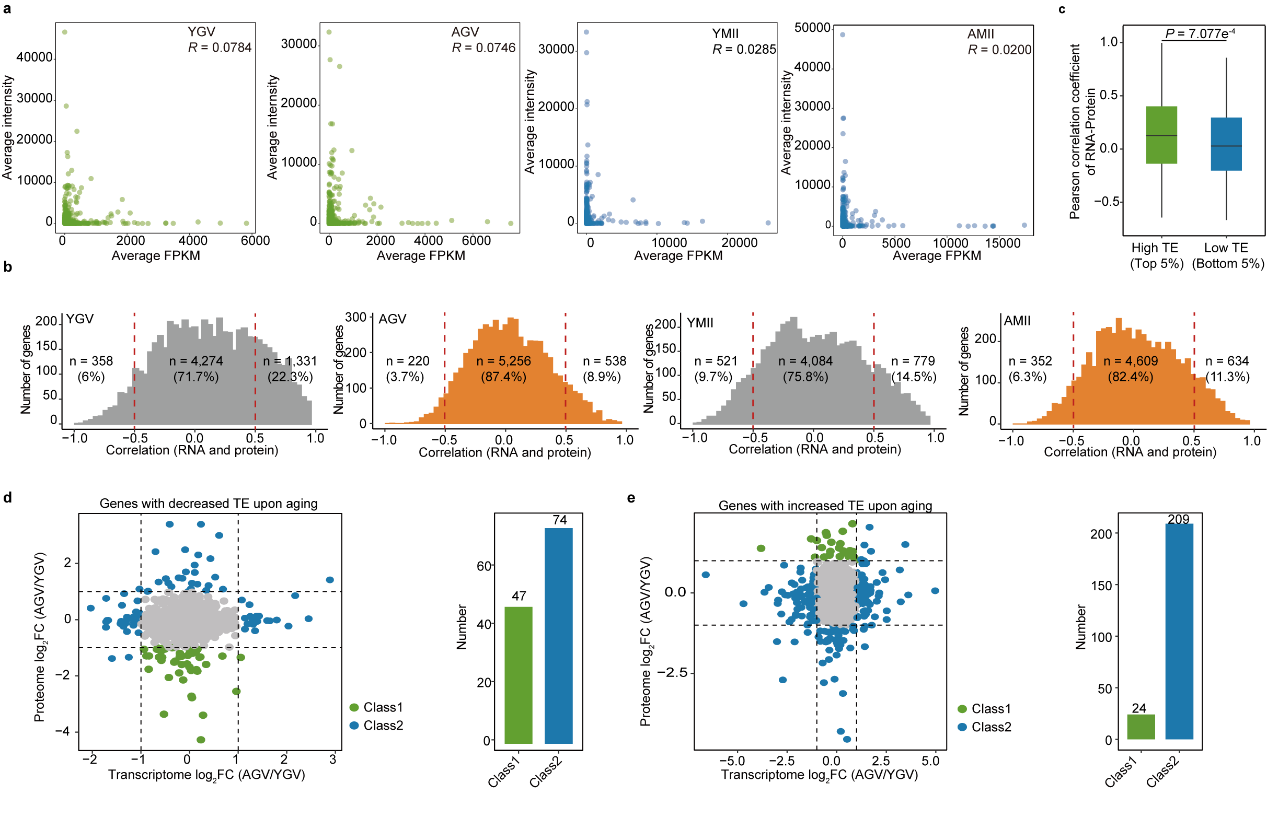
**

**Extended Data Fig. 8: Low RNA-protein correlation in human oocytes**

**a,** The correlation coefficient (*R*) between RNA and protein expression levels across all detected genes in the indicated oocytes. The average RNA and protein levels of all detected genes in indicated oocyte groups were used to calculate RNA-protein Pearson’s correlation coefficient. The number of genes analyzed (n): 5,963 (YGV), 6,014 (OGV), 5,384 (YMII), 5,595 (OGV).

**b,** The distribution of correlation coefficients for RNA-protein gene pairs detected in the indicated human oocytes. The number of genes (n) with an RNA-protein correlation below 0.5, between -0.5 and 0.5, and above 0.5, along with their respective percentages among all analyzed genes, were indicated in the figure. Pearson’s correlation coefficient of each gene was calculated using the average RNA and protein expression level of that gene in indicated oocytes. Pearson’s correlation coefficient of all genes was used to draw the bar plot.

**c,** The box plot showing the RNA-protein correlation of genes with the top 5% (n = 282) or bottom 5% (n = 282) translational efficiency (TE). The translational efficiency was analyzed from public data (GSA-Human: HRA004706)6. *P* values were obtained using two-tailed Mann-Whitney U-tests.

**d**, The two-dimensional volcano plot illustrating the protein and RNA expression changes of genes with decreased TE in aged GV oocytes (n = 1412, **left**) and the number of genes of each group (**right**). Genes with decreased TE (log2(Foldchange[AGV/YGV]) of TE < -1) were identified from published datasets (GSA-Human: HRA004706)6. Group 1: Genes that exhibit more than a 2-fold decrease in protein levels but not in RNA levels. Group 2: Genes that undergo aging-induced changes in protein or RNA levels but do not belong to Group 1.

**e**, The two-dimensional volcano plot illustrating the protein and RNA expression changes of genes with increased TE (n = 1339, **left**) in aged GV oocytes and the number of genes of each group (**right**). Genes with increased TE (log2(Foldchange[AGV/YGV]) of TE > 1) were identified from published datasets (GSA-Human: HRA004706)6. Group 1: Genes that exhibit more than a 2-fold increase in protein levels but not in RNA levels. Group 2: Genes that undergo aging-induced changes in protein or RNA levels but do not belong to Group 1.

**a-e**, YGV, Young GV oocytes; AGV, Aged GV oocytes; YMII. Young MII oocytes; AMII, Aged MII oocytes.

**
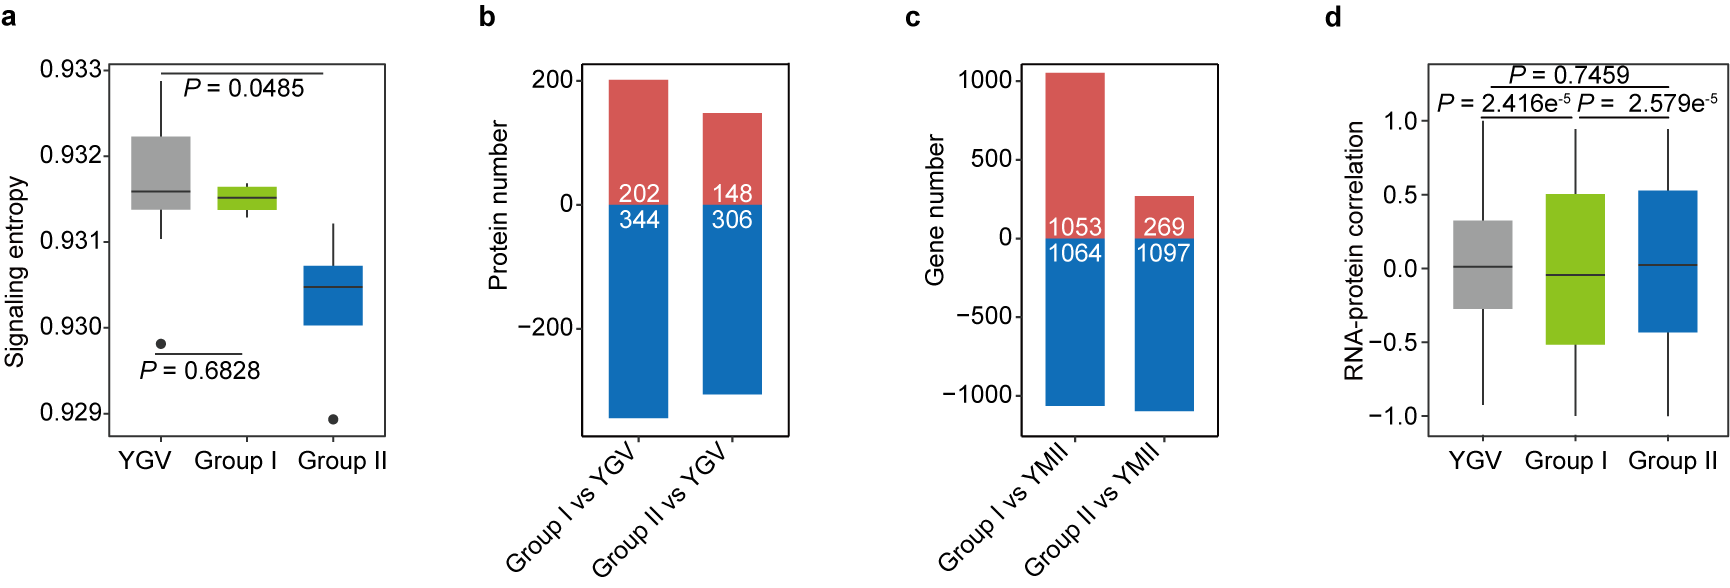
Extended Data Fig. 9: Proteomic data failed to capture the molecular heterogeneity in human-aged oocytes at the MII stage**

**a,** The signaling entropy calculated using proteomic data in indicated human-aged MII oocytes. *P* value was obtained using two-tailed Mann-Whitney U-tests. n = 8 (YMII), 8 (AMII).

**b,** Number of DEPs in the indicated oocytes compared to young GV oocytes. The proteins satisfying |Log2Foldchange| > 1 and *P* values < 0.05 were identified as DEPs. Red bars indicated upregulated proteins and blue bars indicated downregulated proteins. *P* values were obtained using the Wilcoxon rank-sum test.

**c,** Numbers of DEGs in the indicated oocytes compared to young MII oocytes. The genes satisfying |Log2Foldchange| > 1 and *P* values < 0.05 were identified as DEGs. Red bars indicated upregulated genes and blue bars indicated downregulated genes. *P* values were obtained using the Wald test within a negative binomial generalized linear model.

**d,** The RNA-protein correlation in indicated oocytes. *P* value was obtained using two-tailed Mann-Whitney U-tests. n = 8 (YMII), 8 (AMII). The average RNA and protein levels of all detected genes in indicated oocyte groups were used to calculate RNA-protein Pearson’s correlation coefficient.

**a-d,** YMII, young MII oocytes.

**Supplementary references**

1. Sha, Q.Q. *et al.* CNOT6L couples the selective degradation of maternal transcripts to meiotic cell cycle progression in mouse oocyte. *Embo j* **37** (2018).

2. Wu, Y.-W. *et al.* Dynamic mRNA degradome analyses indicate a role of histone H3K4 trimethylation in association with meiosis-coupled mRNA decay in oocyte aging. *Nature Communications* **13**, 3191 (2022).

3. Gou, M. *et al.* Reprogramming of ovarian aging epigenome by resveratrol. *PNAS Nexus* **2**, pgac310 (2023).

4. Hu, W. *et al.* Single-cell transcriptome and translatome dual-omics reveals potential mechanisms of human oocyte maturation. *Nat Commun* **13**, 5114 (2022).

5. Ntostis, P. *et al.* The impact of maternal age on gene expression during the GV to MII transition in euploid human oocytes. *Hum Reprod* **37**, 80-92 (2021).

6. Huang, J. *et al.* Multi-Omics Analysis Reveals Translational Landscapes and Regulations in Mouse and Human Oocyte Aging. *Adv Sci (Weinh)* **10**, e2301538 (2023).
